# Supplementary material for: Regulation of lipid synthesis by the RNA helicase Mov10 controls Wnt5a production
Source: PubMed Central journal article supplement (PMC4753523; doi:10.1038/oncsis.2015.15), 2015-06-01
Supplement: oncsis201515x1.pdf [file oncsis201515x1.pdf]

## **Supplementary Figure Legend**

### **Supp. Figure S1**

Wnt5a mRNA levels relative to L32 mRNA. Error bars denote standard deviation.

### **Supp. Figure S2**

Inhibition of Ror2 protein expression with two shRNA constructs.

### **Supp. Figure S3**

PORCN protein expression in UACC903 cells expressing control shRNA, PORCN shRNA #1, 2, 3. Tubulin is a loading control.

### **Supp. Figure S4**

Collagen invasion assay of control and Mov10 shRNA expressing cells treated with the FASN inhibitor cerulenin.
