# Supplementary material for: Regulation of lipid synthesis by the RNA helicase Mov10 controls Wnt5a production
Source: PubMed Central journal article supplement (PMC4753523; doi:10.1038/oncsis.2015.15), 2015-06-01

Wang et al. Supp. Figure S1

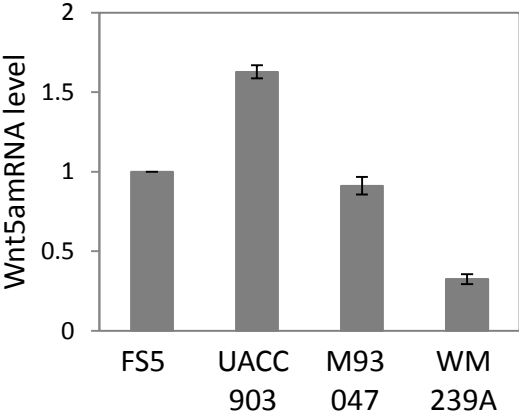

Wang et al. Supp. Figure S2

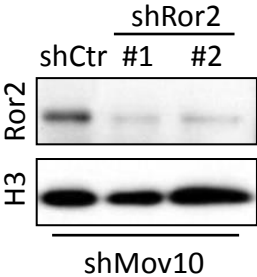

Wang et al. Supp. Figure S3

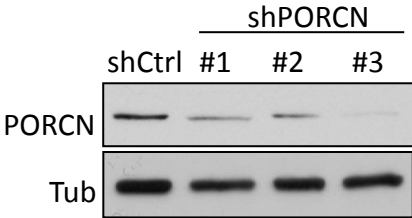

Wang et al. Supp. Figure S4

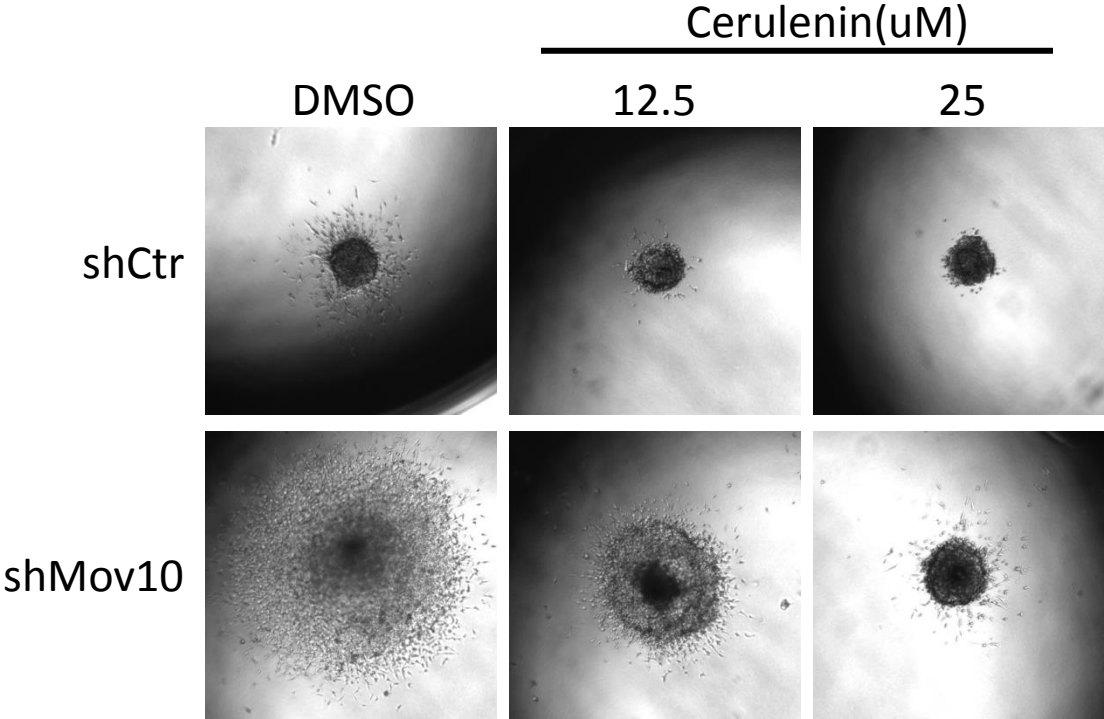

Supplement: oncsis201515x2.pdf [file oncsis201515x2.pdf]
